# Supplementary material
Source: HighWire-hosted journal article supplement (https://qdcxjkg.com/highwire/filestream/114457/field_highwire_adjunct_files/0/Supplemental_files_VR1.pdf)
Supplement: Supplemental_files_VR1.pdf [file Supplemental_files_VR1.pdf]

**Table S1** – Somatic mutation profile according to exposure to passive smoking in univariate analysis

|                                        |                | Mut. in HER2<br>(n=174) |                |            | Mut. in BRAF<br>(n=196) |                |            | Mut. in PIK3CA<br>(n=164) |                 |            |
|----------------------------------------|----------------|-------------------------|----------------|------------|-------------------------|----------------|------------|---------------------------|-----------------|------------|
|                                        |                | n                       | %<br>[95%CI]   | P<br>value | n                       | %<br>[95%CI]   | P<br>value | n                         | %<br>[95%CI]    | P<br>value |
| <b>Exposure to Passive Smoking</b>     | Never          | 2                       | 4%<br>[1%-13%] | 1,0*       | 4                       | 6%<br>[2%-15%] | 0.741*     | 2                         | 4%<br>[<1%-14%] | 0.586*     |
|                                        | Ever           | 6                       | 5%<br>[2%-11%] |            | 6                       | 5%<br>[2%-10%] |            | 2                         | 2%<br>[<1%-6%]  |            |
| <b>Cumulative duration of exposure</b> | Never          | 2                       | 4%             | NC         | 4                       | 6%             | NC         | 2                         | 4%              | NC         |
|                                        | ≤20 years      | 3                       | 8%             |            | 3                       | 7%             |            | 1                         | 3%              |            |
|                                        | 20 to 30years  | 2                       | 5%             |            | 1                       | 2%             |            | 1                         | 3%              |            |
|                                        | >30 years      | 1                       | 3%             |            | 2                       | 5%             |            | 0                         | 0%              |            |
| <b>Time of exposure</b>                | Never          | 2                       | 3%             | NC         | 5                       | 6%             | NC         | 2                         | 4%              | NC         |
|                                        | Childhood      | 2                       | 3%             |            | 2                       | 3%             |            | 0                         | 0%              |            |
|                                        | Adulthood only | 4                       | 10%            |            | 3                       | 7%             |            | 2                         | 2%              |            |
| <b>Exposure at workplace</b>           | Never          | 8                       | 6%             | 0.225*     | 9                       | 5%             | 0.568*     | 4                         | 3%              | 0.559*     |
|                                        | Ever           | 0                       | 0%             |            | 1                       | 4%             |            | 0                         | 0%              |            |
| <b>Domestic exposure</b>               | Never          | 2                       | 3%             | 0.330*     | 5                       | 6%             | 0.359*     | 2                         | 3.5%            | 0.433*     |
|                                        | Ever           | 6                       | 6%             |            | 5                       | 4%             |            | 2                         | 1.9%            |            |

Mut.: mutation; Rearr.: rearrangement; NC: not computable

\*Fisher test; others are Chi-squared tests

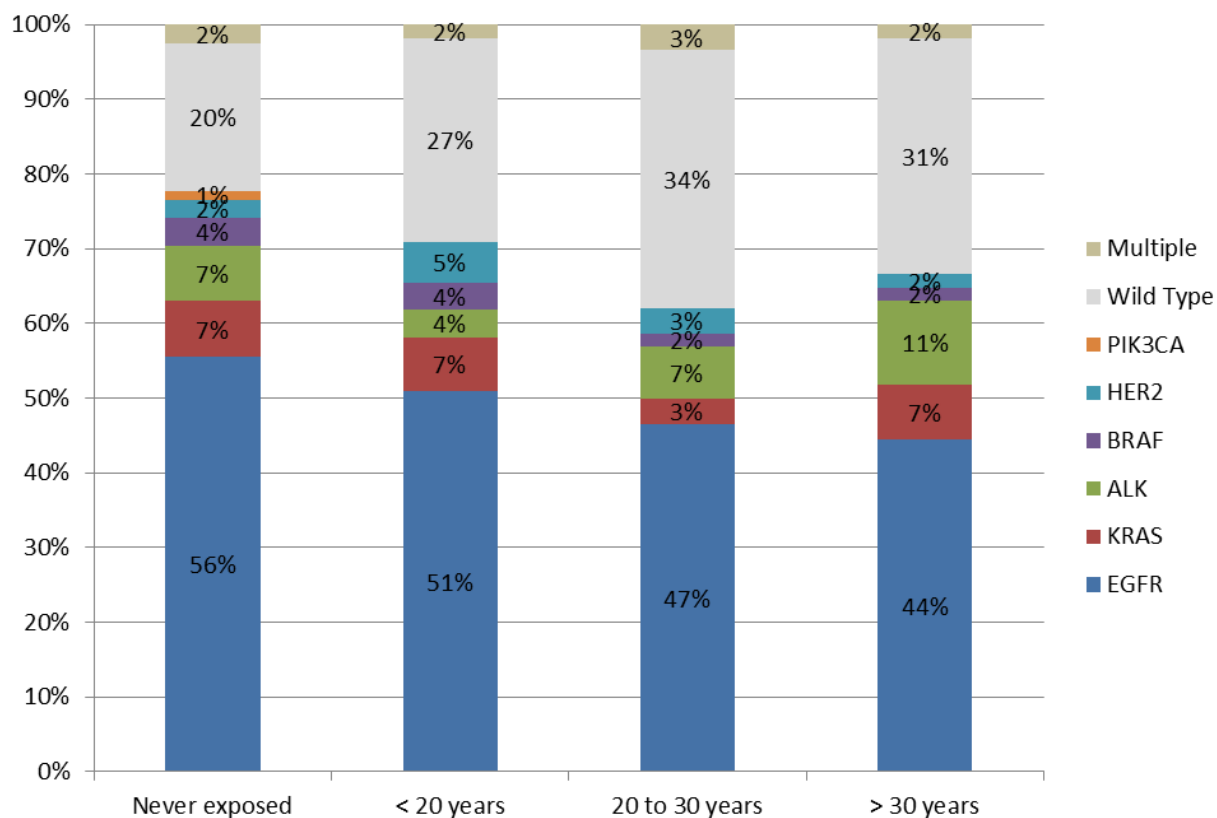

**Figure S1** – Biomarker pattern according to cumulative duration of exposure (CDE) to overall passive smoking in the 248 patients with full main biomarker analysis. Wild-type means that all biomarkers tested – with at least EGFR, KRAS, and ALK – were wild-type. Multiple means that more than one mutation – in different gene – was found in the same patient
